# Supplementary material
Source: Springer Nature journal article supplement (https://www.springermedizin.de/resource/supplementary/12939_2013_538_MOESM1_ESM.pdf/9551126)
Supplement: MOESM1 [file 9551126]

## **Structural**

Health Care  
System

Practice context

Organisation of  
practice

**Access:** Available Affordable,  
Accommodate, Appropriate ,  
Acceptable

## **Patient-Provider**

**relationship:** Interpreter,  
Bilingual staff, Staff training on  
cultural sensitivity, Specialised  
refugee health nurse, community  
engagement

**Coordination:** Shared  
assessment, Communication  
Care planning, Teamwork ,  
Referral path

**Quality of  
care:**

Technical, Inter-  
personal  
communication,  
patient  
satisfaction,  
culturally  
competent
